# Supplementary material for: The effect of COVID‐19 pandemic‐related financial challenges on mental health and well‐being among US older adults
Source: PubMed Central journal article supplement — J Am Geriatr Soc. 2022 Apr 15;70(6):1629–41. doi: 10.1111/jgs.17808 (PMC9115091; doi:10.1111/jgs.17808), 2022-04-15
Supplement: JGS-70-1629-s001.pdf [file JGS-70-1629-s001.pdf]

Supplemental Table 1

National Health and Aging Trend Study COVID-19 survey participant characteristics

|                                        | <b>Characteristic</b> |
|----------------------------------------|-----------------------|
| Age (%)                                |                       |
| 65-74                                  | 737 (41)              |
| 75-79                                  | 913 (27)              |
| 80-84                                  | 738 (17)              |
| ≥85                                    | 869 (15)              |
| Gender (%)                             |                       |
| Male                                   | 1,370 (44)            |
| Female                                 | 1,887 (56)            |
| Race/ethnicity (%)                     |                       |
| White                                  | 2,472 (81)            |
| Black                                  | 543 (8)               |
| Other                                  | 67 (4)                |
| Hispanic                               | 133 (8)               |
| Mean income to poverty ratio mean (SE) | 4.25 (0.16)           |
| Mean income, in U.S. \$ (SE)           | 64,998 (2,431)        |
| Educational achievement (%)            |                       |
| <High school                           | 471 (14)              |
| High school                            | 827 (24)              |
| Some college                           | 897 (29)              |
| Bachelors or higher                    | 1,023 (33)            |
| Mean financial strain (SE)             | 0.07 (0 .01)          |
| Homeownership (%)                      |                       |
| Rent                                   | 869 (25)              |
| Own with mortgage                      | 670 (25)              |
| Own without payments                   | 1,680 (50)            |
| Retirement status (%)                  |                       |
| No                                     | 2,696 (90)            |
| Yes                                    | 341 (10)              |
| Professional occupation (%)            |                       |
| No                                     | 1,955 (60)            |
| Yes                                    | 1,290 (40)            |
| Mean household size (SE)               | 1.97 (0.03)           |
| Marital status (%)                     |                       |
| Married/partnered                      | 1,600 (55)            |
| Separated/divorced                     | 443 (14)              |
| Widowed                                | 1,105 (27)            |
| Never married                          | 107 (3)               |
| Mean BMI, in kg/m <sup>2</sup> (SE)    | 28.27 (0.15)          |
| Mean chronic conditions (SE)           | 1.56 (0.02)           |
| Self-rated health (%)                  |                       |
| Poor                                   | 110 (3)               |

|                                      |             |
|--------------------------------------|-------------|
| Fair                                 | 574 (17)    |
| Good                                 | 1,185 (34)  |
| Very good                            | 1,055 (34)  |
| Excellent                            | 329 (12)    |
| Depressive symptoms <sup>a</sup> (%) |             |
| No                                   | 2,946 (91)  |
| Yes                                  | 311 (9)     |
| Anxiety symptoms <sup>b</sup> (%)    |             |
| No                                   | 2,988 (92)  |
| Yes                                  | 248 (8)     |
| Mean walking speed, in m/s (SE)      | 0.76 (0.01) |
| Mean sleep quality score (SE)        | 7.26 (0.05) |
| Isolation (%)                        |             |
| Not isolated                         | 103 (3)     |
| Socially isolated                    | 460 (15)    |
| Severely socially isolated           | 2,581 (82)  |

Note: Descriptive statistics calculated before multiple imputation, applying sampling weights so that inferences can be drawn to 2020 population of US adults aged 70 and older.

Supplemental Table 2

Associations between income decline during COVID-19 and financial difficulty due to COVID-19 with mental health summary score and components of mental health summary score, including symptoms of anxiety, depression and PTSD about the outbreak, during the COVID-19 pandemic among National Health and Aging Trends Study participants

|                                                                           | <b>Income decline during COVID-19<sup>a</sup></b> | <b>n</b> | <b>Financial difficulty due to COVID-19<sup>a</sup></b> | <b>n</b> |
|---------------------------------------------------------------------------|---------------------------------------------------|----------|---------------------------------------------------------|----------|
| Mental health related to COVID-19 summary score coefficient (SE), p value | <b>-0.1592 (0.0464), &lt;0.001</b>                | 3029     | <b>-0.3811 (0.0569), &lt;0.001</b>                      | 3025     |
| Denies feeling worried/anxious about the outbreak OR (95% CI)             | <b>0.71 (0.54, 0.94)</b>                          | 3028     | <b>0.50 (0.36, 0.69)</b>                                | 3024     |
| Denies feeling sad/depressed about the outbreak OR (95% CI)               | <b>0.69 (0.52, 0.91)</b>                          | 3028     | <b>0.37 (0.27, 0.51)</b>                                | 3024     |
| Denying PTSD symptoms about the outbreak coefficient (SE), p value        | <b>-0.1676 (0.0498), 0.001</b>                    | 3028     | <b>-0.3924 (0.0621), &lt;0.001</b>                      | 3025     |

Note: All models adjusted for age, gender, race/ethnicity, and 2019 values for income to poverty ratio, financial strain, retirement status, BMI, chronic conditions, self-rated health, presence of depressive symptoms, presence of anxiety symptoms, walking speed, sleep quality and social isolation. Sampling weights were applied to all analyses so that inferences can be drawn to 2020 population of US adults aged 70 and older and applied propensity score weights to produce doubly robust estimates of the average treatment effect. In addition to the variables listed above for the adjusted models, the propensity score model included education, professional occupation, homeownership, household size and marital status. Bold font indicates statistically significant results at  $p < 0.05$ .
